# Supplementary material for: The “electron crystal” behavior in copper chalcogenides Cu2X (X = Se, S)
Source: Royal Society of Chemistry journal article supplement (doi:10.1039/c6ta10725g), 2017-01-01
Supplement: c6ta10725g1.pdf [file c6ta10725g1.pdf]

## Supporting Information for

### The “Electron Crystal” Behavior in Copper Chalcogenides $\text{Cu}_2\text{X}$ ( $\text{X}=\text{Se}, \text{S}$ )

Yongxing Sun<sup>1,2,3</sup>, Lili Xi<sup>1,3</sup>, Jiong Yang<sup>1\*</sup>, Lihua Wu<sup>1</sup>, Xun Shi<sup>3</sup>, Lidong Chen<sup>3</sup>, Jeffrey Snyder<sup>4</sup>, Jihui Yang<sup>5</sup>, and Wenqing Zhang<sup>1,2\*</sup>

<sup>1</sup>*Materials Genome Institute, Shanghai University, Shanghai 200444, China*

<sup>2</sup>*School of Materials Science and Engineering, Shanghai University, Shanghai 200444, China*

<sup>3</sup>*State Key Laboratory of High Performance Ceramics and Superfine Microstructure, Shanghai Institute of Ceramics, Chinese Academy of Sciences, Shanghai 200050, China*

<sup>4</sup>*Department of Materials Science and Engineering, Northwestern University, Evanston, Illinois 60208, USA*

<sup>5</sup>*Material Science and Engineering Department, University of Washington, Seattle, WA 98195, USA*

This supporting information includes:

**Fig. SI1. Band structures of S1, S2, and Gulay structures.**

**Fig. SI2. The pCOHP analysis for the Cu-Se bond in  $\text{Cu}_2\text{Se}$  with the antifluorite structure.**

**Fig. SI3. The band structure of S3  $\text{Cu}_2\text{Se}$  with some Se vacancy.**

**Fig. SI4. Electronic band structures of  $\text{Cu}_{1.92}\text{Se}$  in the low temperature S3 structure, with the Cu vacancy locating at different Cu sites.**

**Fig. SI5. Electronic band structures of  $\text{Cu}_2\text{Se}$ ,  $\text{Cu}_{1.96}\text{Se}$ ,  $\text{Cu}_{1.93}\text{Se}$ , and  $\text{Cu}_2\text{Se}$  with all Cu ions disordered.**

**Fig. SI6. Theoretical absolute electrical conductivities as a function of hole concentrations at 300K and 800K.**

**Fig. SI7. Wave functions at the valence band maxima for both LT and HT  $\text{Cu}_2\text{Se}$ .**

**Table SI1. Structural parameters and atomic coordinates for S1, S2, S3 and Gulay structures.**

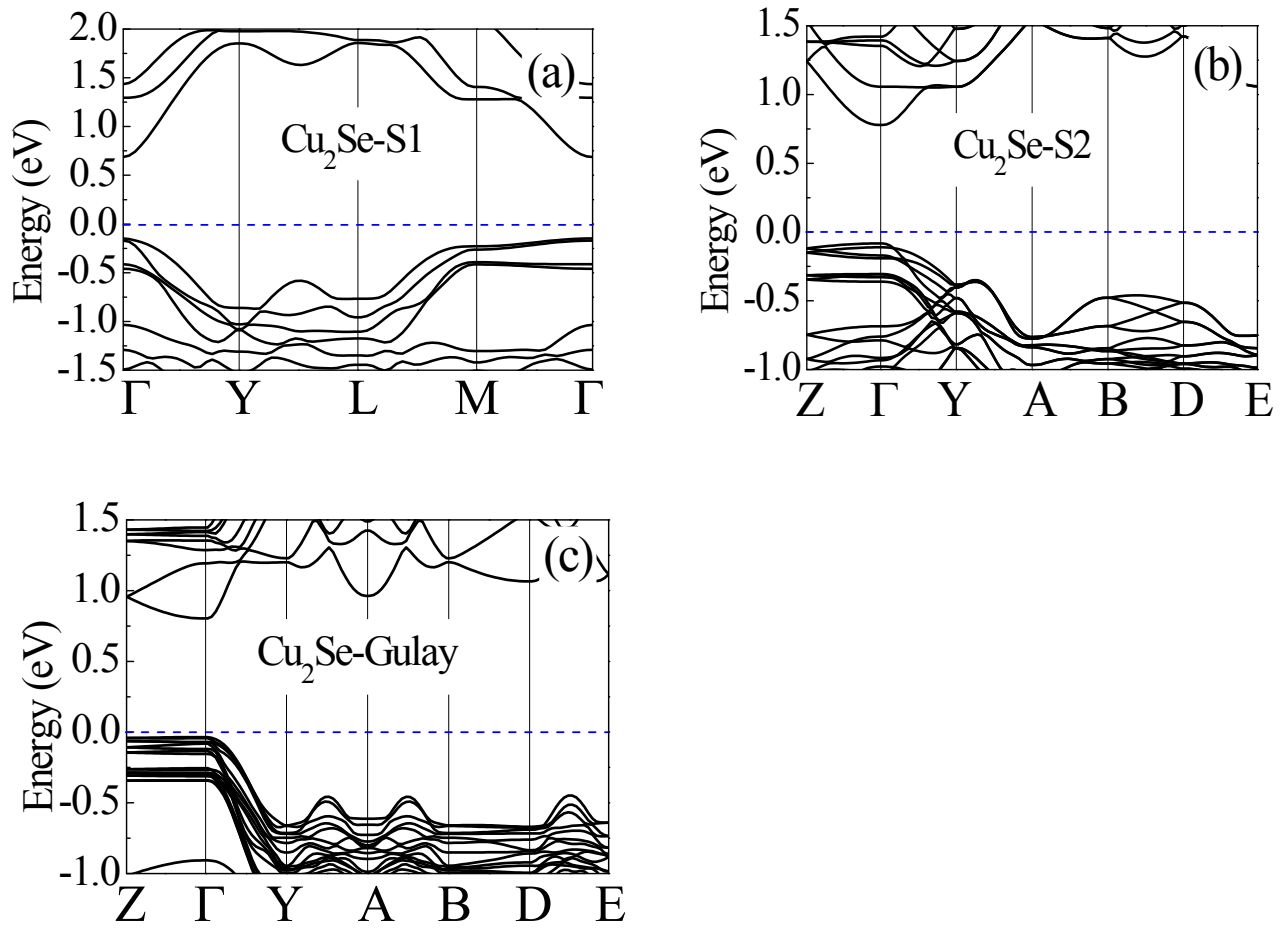

Figure S11. Electronic band structures for  $\text{Cu}_2\text{Se}$  in the LT (a) S1, (b) S2, and (c) Gulay structures.

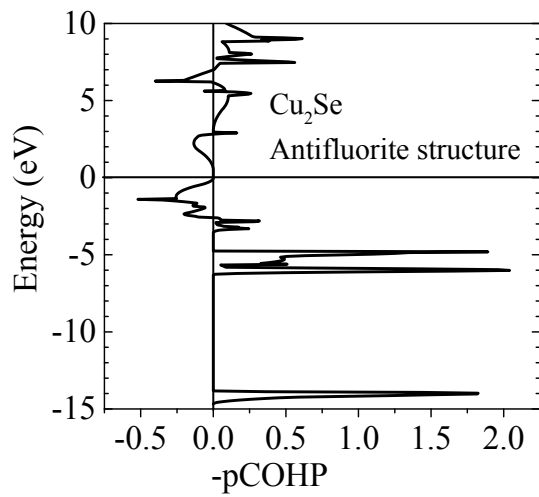

Figure S12. The pCOHP analysis for the Cu-Se bond in  $\text{Cu}_2\text{Se}$  with the antifluorite structure.

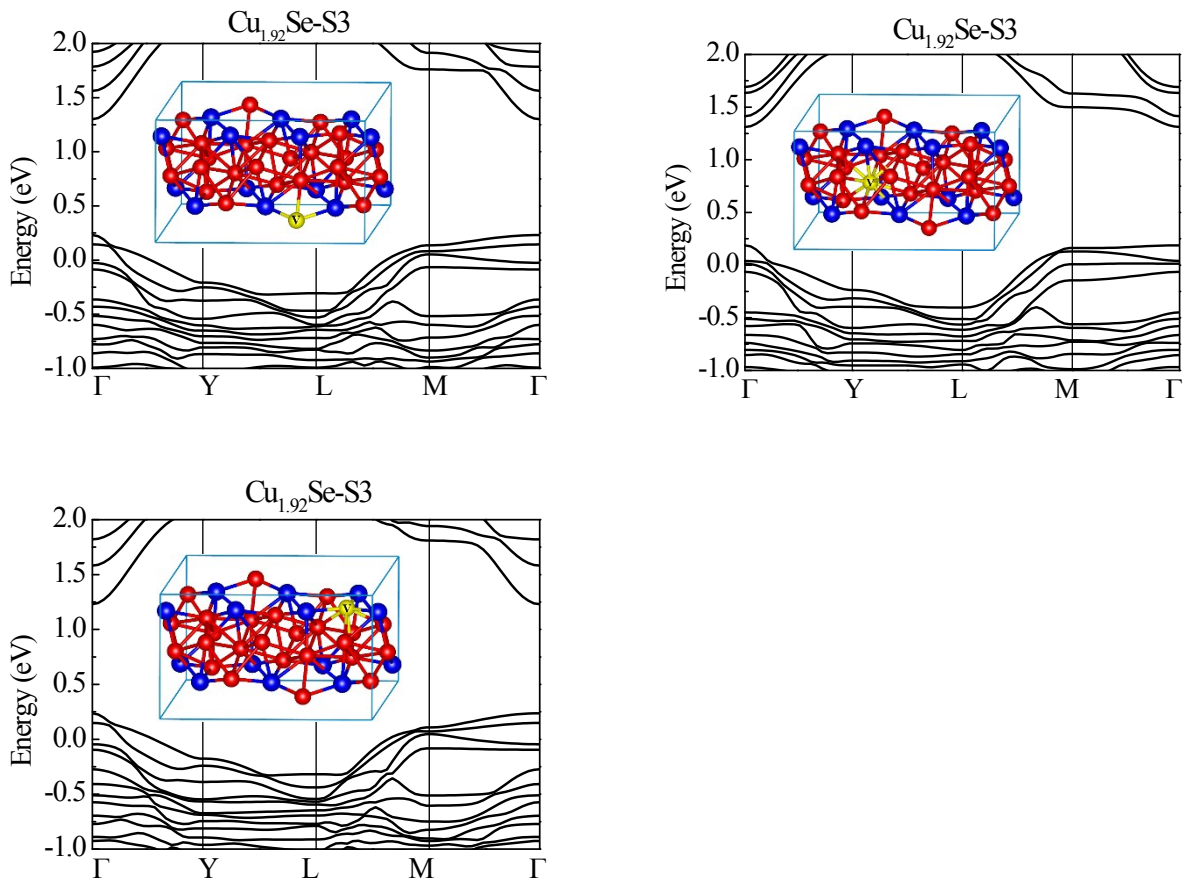

Figure SI3. Electronic band structures of  $\text{Cu}_{1.92}\text{Se}$  in the low temperature S3 structure, with the Cu vacancy (denoted as “V”) locating at different Cu sites. The first panel is used in the main text.

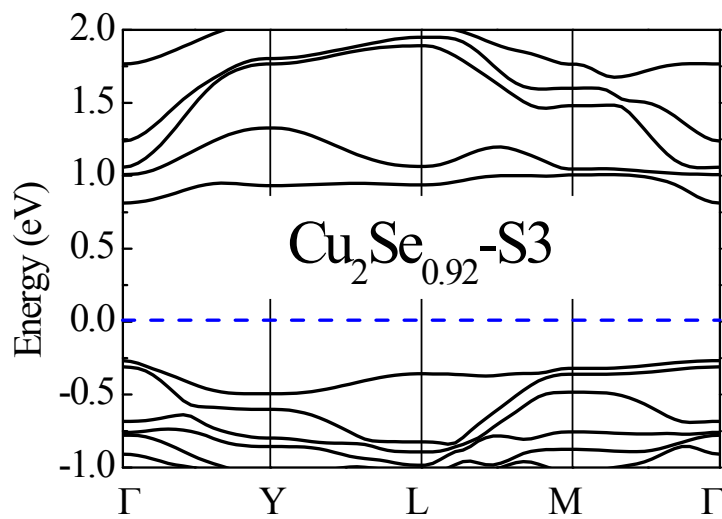

Figure SI4. The band structure of S3  $\text{Cu}_2\text{Se}$  with Se vacancy.

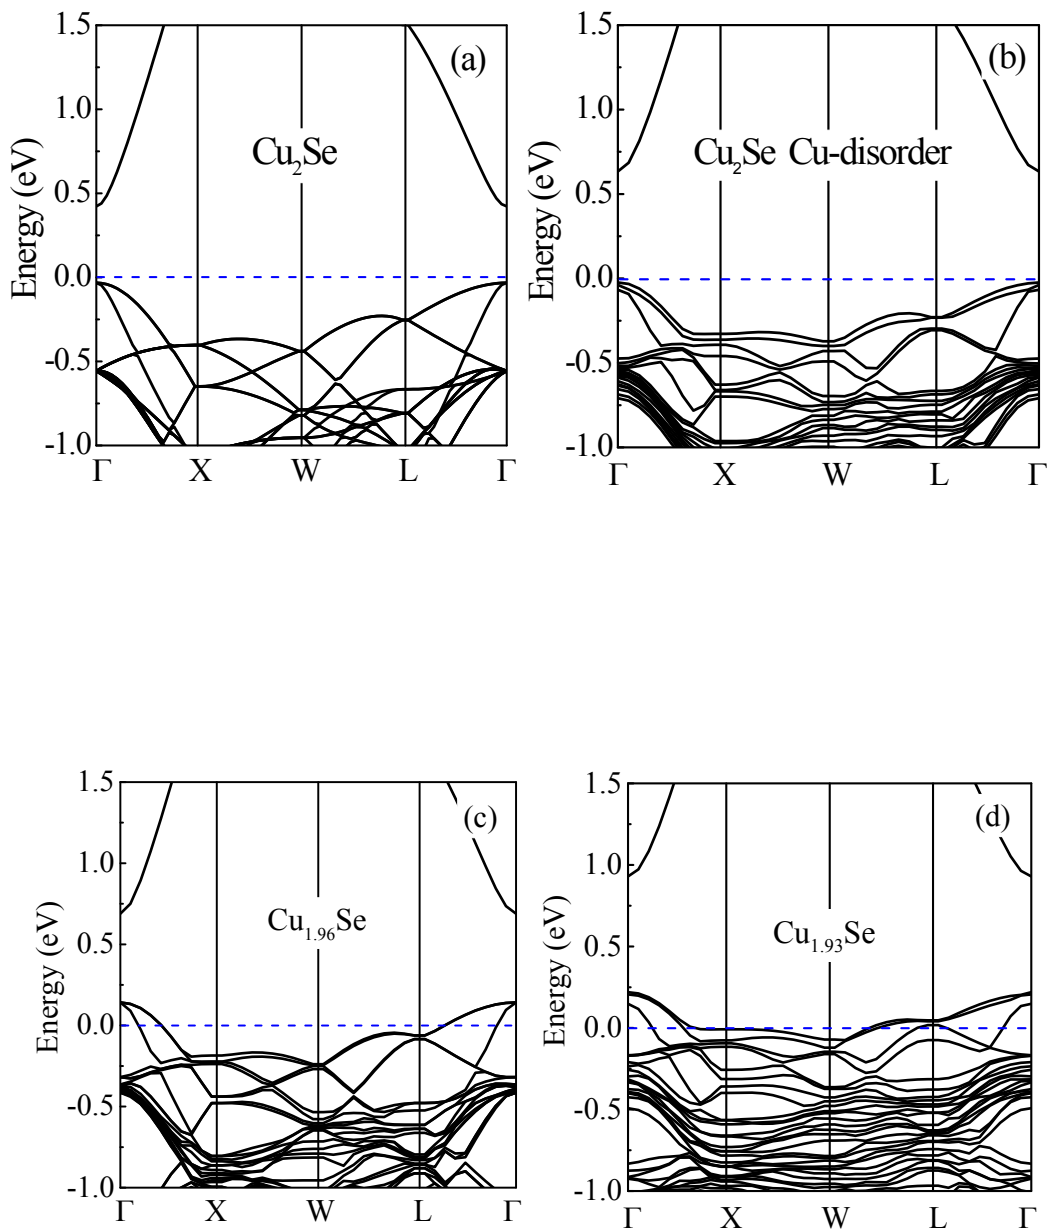

Figure SI5. Electronic band structures of (a)  $\text{Cu}_2\text{Se}$ , (b)  $\text{Cu}_2\text{Se}$  with all Cu ions disordered, (c)  $\text{Cu}_{1.96}\text{Se}$  and (d)  $\text{Cu}_{1.93}\text{Se}$ . All the calculated structures are based on the high temperature antifluorite structure ( $\text{Cu}_{54}\text{Se}_{27}$ ). Dotted lines denote the respective Fermi-levels.

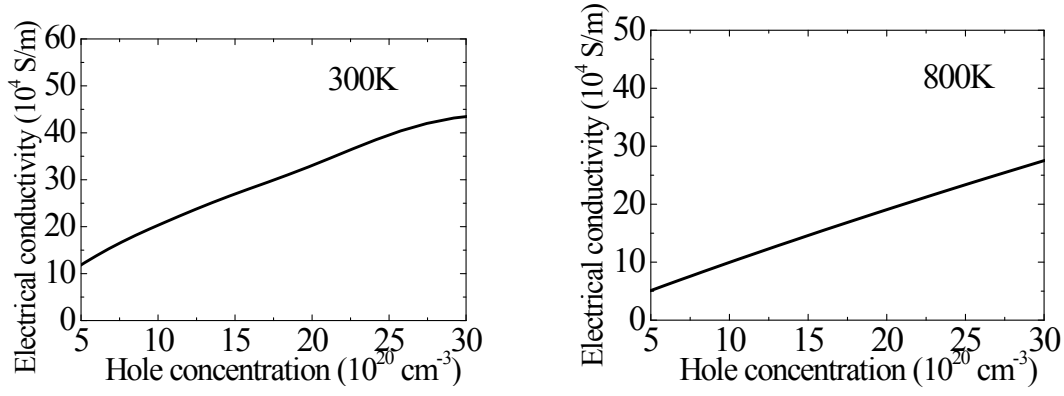

Figure S16. The theoretical absolute electrical conductivities as a function of hole concentrations at 300K and 800K.

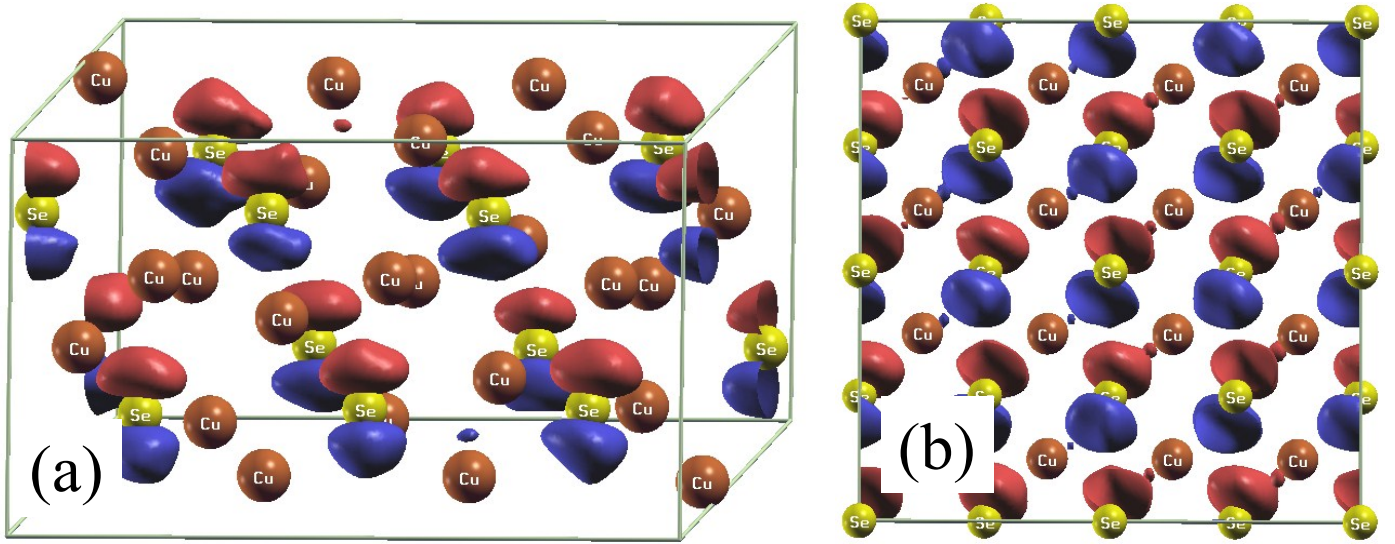

Figure S17. The electron wave functions at the valence band maxima for (a) the low temperature phase (S3 structure) and (b) the high temperature phase. The colors indicate the signs of the wave functions.

Table S11. Structural parameters and atomic coordinates for S1, S2, S3, and Gulay structures.

| Structure | Space group | Lattice parameters |        |        |              |             |              |
|-----------|-------------|--------------------|--------|--------|--------------|-------------|--------------|
|           |             | a (Å)              | b (Å)  | c (Å)  | $\alpha$ (°) | $\beta$ (°) | $\gamma$ (°) |
| S1        | P-1 (2)     | 7.101              | 7.122  | 7.407  | 81.227       | 80.503      | 119.878      |
| S2        | C2/c (15)   | 7.120              | 12.333 | 14.364 | 90.000       | 100.333     | 90.000       |
| S3        | P-1 (2)     | 7.078              | 12.434 | 7.428  | 90.236       | 108.736     | 90.038       |
| Gulay     | C2/c (15)   | 7.092              | 12.331 | 29.418 | 90.000       | 106.969     | 90.000       |

| Structure | atom | x/a    | y/b    | z/c    | Structure | atom   | x/a    | y/b    | z/c    |
|-----------|------|--------|--------|--------|-----------|--------|--------|--------|--------|
| S1        | Cu1  | 0.3881 | 0.6669 | 0.6818 | Gulay     | Cu1    | 0.2991 | 0.4477 | 0.3299 |
|           | Cu2  | 0.0590 | 0.9998 | 0.6862 |           | Cu2    | 0.9849 | 0.8059 | 0.4211 |
|           | Cu3  | 0.7674 | 0.3325 | 0.8149 |           | Cu3    | 0.6352 | 0.1202 | 0.3308 |
|           | Cu4  | 0.0543 | 0.6948 | 0.4336 |           | Cu4    | 0.3284 | 0.4829 | 0.4515 |
|           | Cu5  | 0.5997 | 0.9200 | 0.4397 |           | Cu5    | 0.0216 | 0.4301 | 0.3898 |
|           | Cu6  | 0.2823 | 0.3842 | 0.4348 |           | Cu6    | 0.6546 | 0.1430 | 0.4236 |
|           | Se7  | 0.5800 | 0.6645 | 0.2203 |           | Cu7    | 0.7179 | 0.5154 | 0.3589 |
|           | Se8  | 0.2420 | 0.0038 | 0.2172 |           | Cu8    | 0.9625 | 0.7834 | 0.2935 |
|           | Se9  | 0.9008 | 0.3264 | 0.2111 |           | Cu9    | 0.2478 | 0.8189 | 0.3582 |
| S2        | Cu1  | 0.7804 | 0.9174 | 0.5853 | Cu10      | 0.5642 | 0.7583 | 0.3897 |        |
|           | Cu2  | 0.2861 | 0.7493 | 0.5937 | Cu11      | 0.9461 | 0.0442 | 0.3587 |        |
|           | Cu3  | 0.3064 | 0.0829 | 0.6492 | Cu12      | 0.3451 | 0.2074 | 0.3914 |        |
|           | Cu4  | 0.0164 | 0.9036 | 0.4674 | Se13      | 0.9894 | 0.1423 | 0.4450 |        |
|           | Cu5  | 0.5779 | 0.7834 | 0.4669 | Se14      | 0.6242 | 0.7801 | 0.3046 |        |
|           | Cu6  | 0.6178 | 0.0638 | 0.4676 | Se15      | 0.9628 | 0.4451 | 0.3048 |        |
|           | Se7  | 0.3572 | 0.9171 | 0.3566 | Se16      | 0.3244 | 0.8181 | 0.4448 |        |
|           | Se8  | 0.3650 | 0.2473 | 0.3604 | Se17      | 0.6648 | 0.4802 | 0.4475 |        |
|           | Se9  | 0.8675 | 0.0858 | 0.3607 | Se18      | 0.3059 | 0.1211 | 0.3024 |        |
| S3        | Cu1  | 0.5426 | 0.8375 | 0.6577 |           |        |        |        |        |
|           | Cu2  | 0.5604 | 0.5133 | 0.6880 |           |        |        |        |        |
|           | Cu3  | 0.5823 | 0.1735 | 0.7514 |           |        |        |        |        |
|           | Cu4  | 0.1653 | 0.8502 | 0.4367 |           |        |        |        |        |
|           | Cu5  | 0.1269 | 0.4631 | 0.4277 |           |        |        |        |        |
|           | Cu6  | 0.1156 | 0.2062 | 0.4231 |           |        |        |        |        |
|           | Cu7  | 0.0527 | 0.9828 | 0.6906 |           |        |        |        |        |
|           | Cu8  | 0.1064 | 0.6594 | 0.8356 |           |        |        |        |        |
|           | Cu9  | 0.0606 | 0.3295 | 0.6835 |           |        |        |        |        |
|           | Cu10 | 0.6569 | 0.9694 | 0.4458 |           |        |        |        |        |
|           | Cu11 | 0.5834 | 0.6694 | 0.4526 |           |        |        |        |        |
|           | Cu12 | 0.7224 | 0.3400 | 0.4252 |           |        |        |        |        |
|           | Se13 | 0.7604 | 0.8424 | 0.2349 |           |        |        |        |        |

|      |        |        |        |
|------|--------|--------|--------|
| Se14 | 0.7425 | 0.5066 | 0.2227 |
| Se15 | 0.7339 | 0.1729 | 0.2094 |
| Se16 | 0.2486 | 0.9968 | 0.2164 |
| Se17 | 0.2438 | 0.6554 | 0.2172 |
| Se18 | 0.2444 | 0.3240 | 0.2049 |

---
